# Supplementary material
Source: PubMed Central journal article supplement (PMC4860043)
Supplement: NIHMS771934-supplement-1.pdf [file NIHMS771934-supplement-1.pdf]

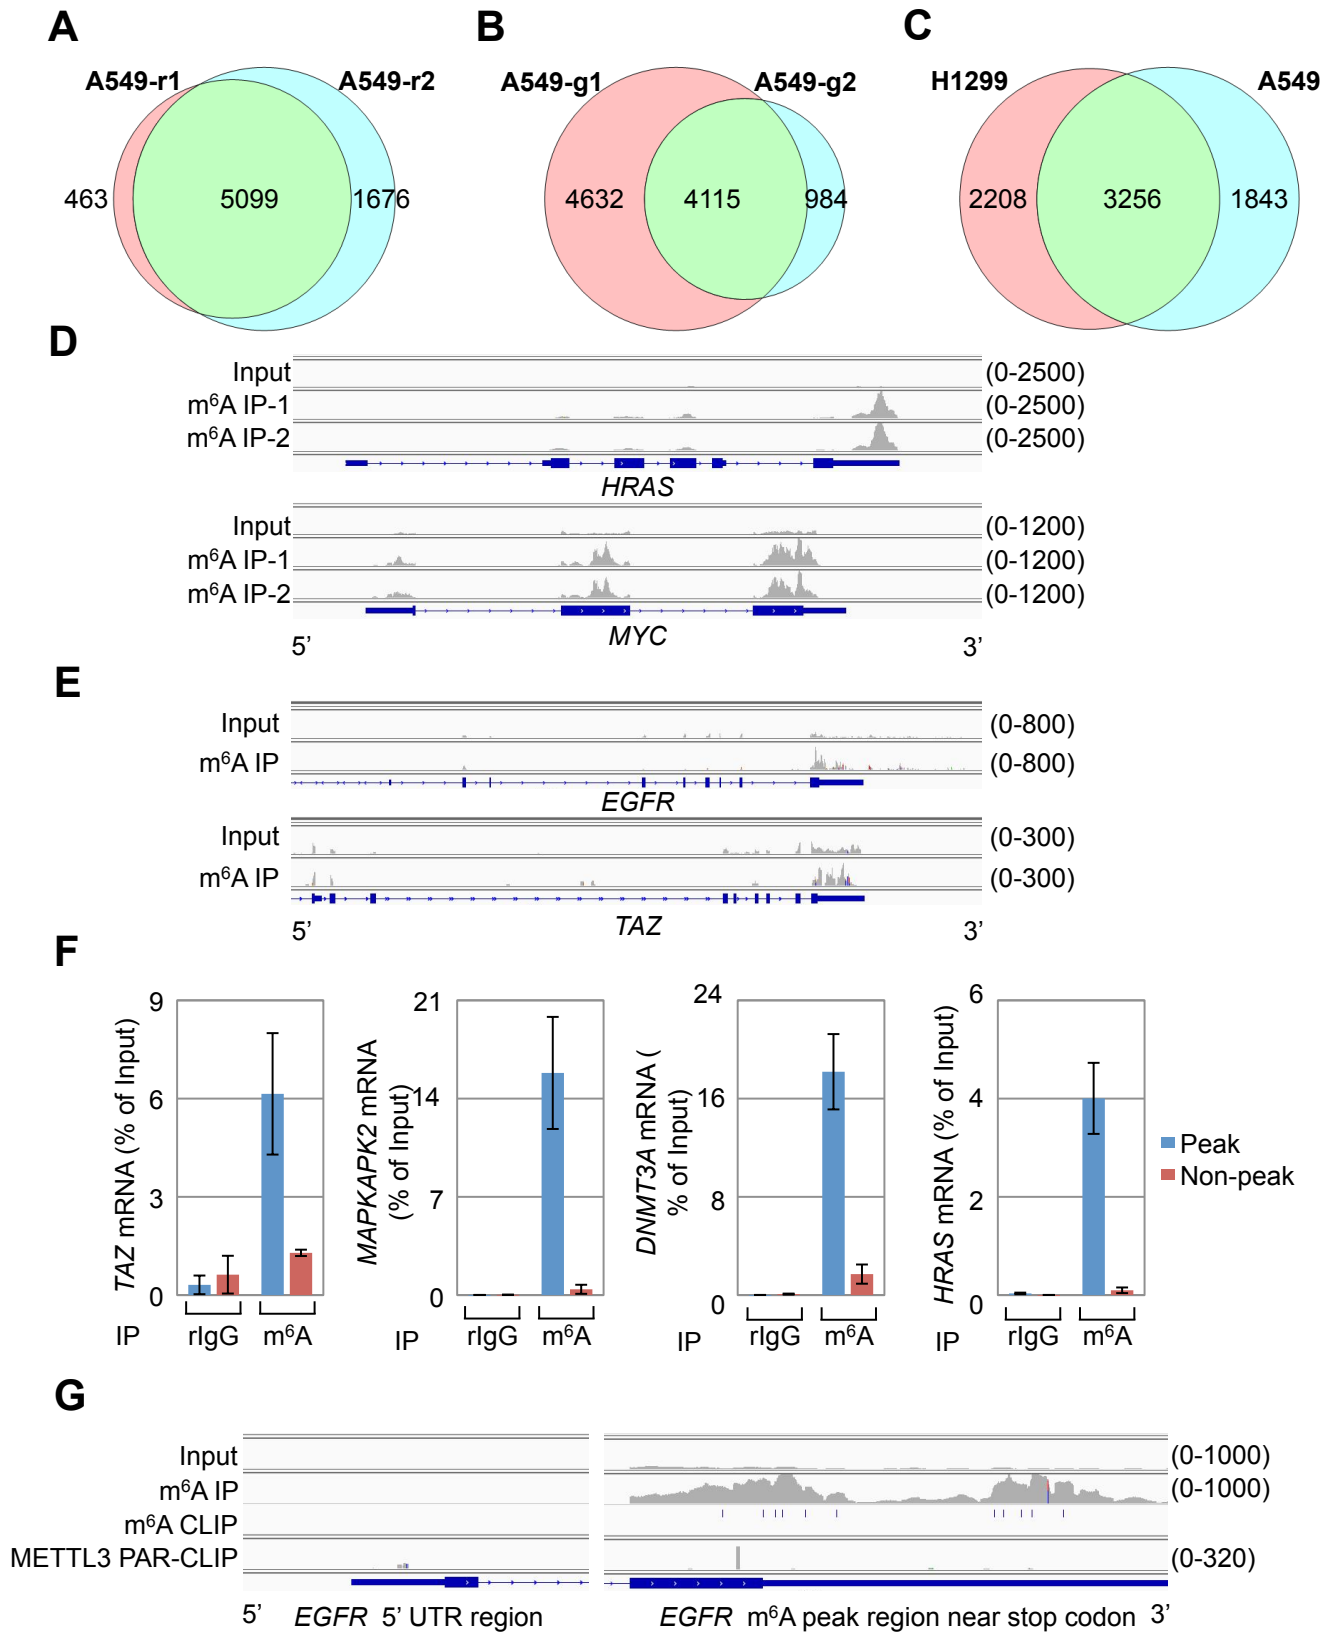

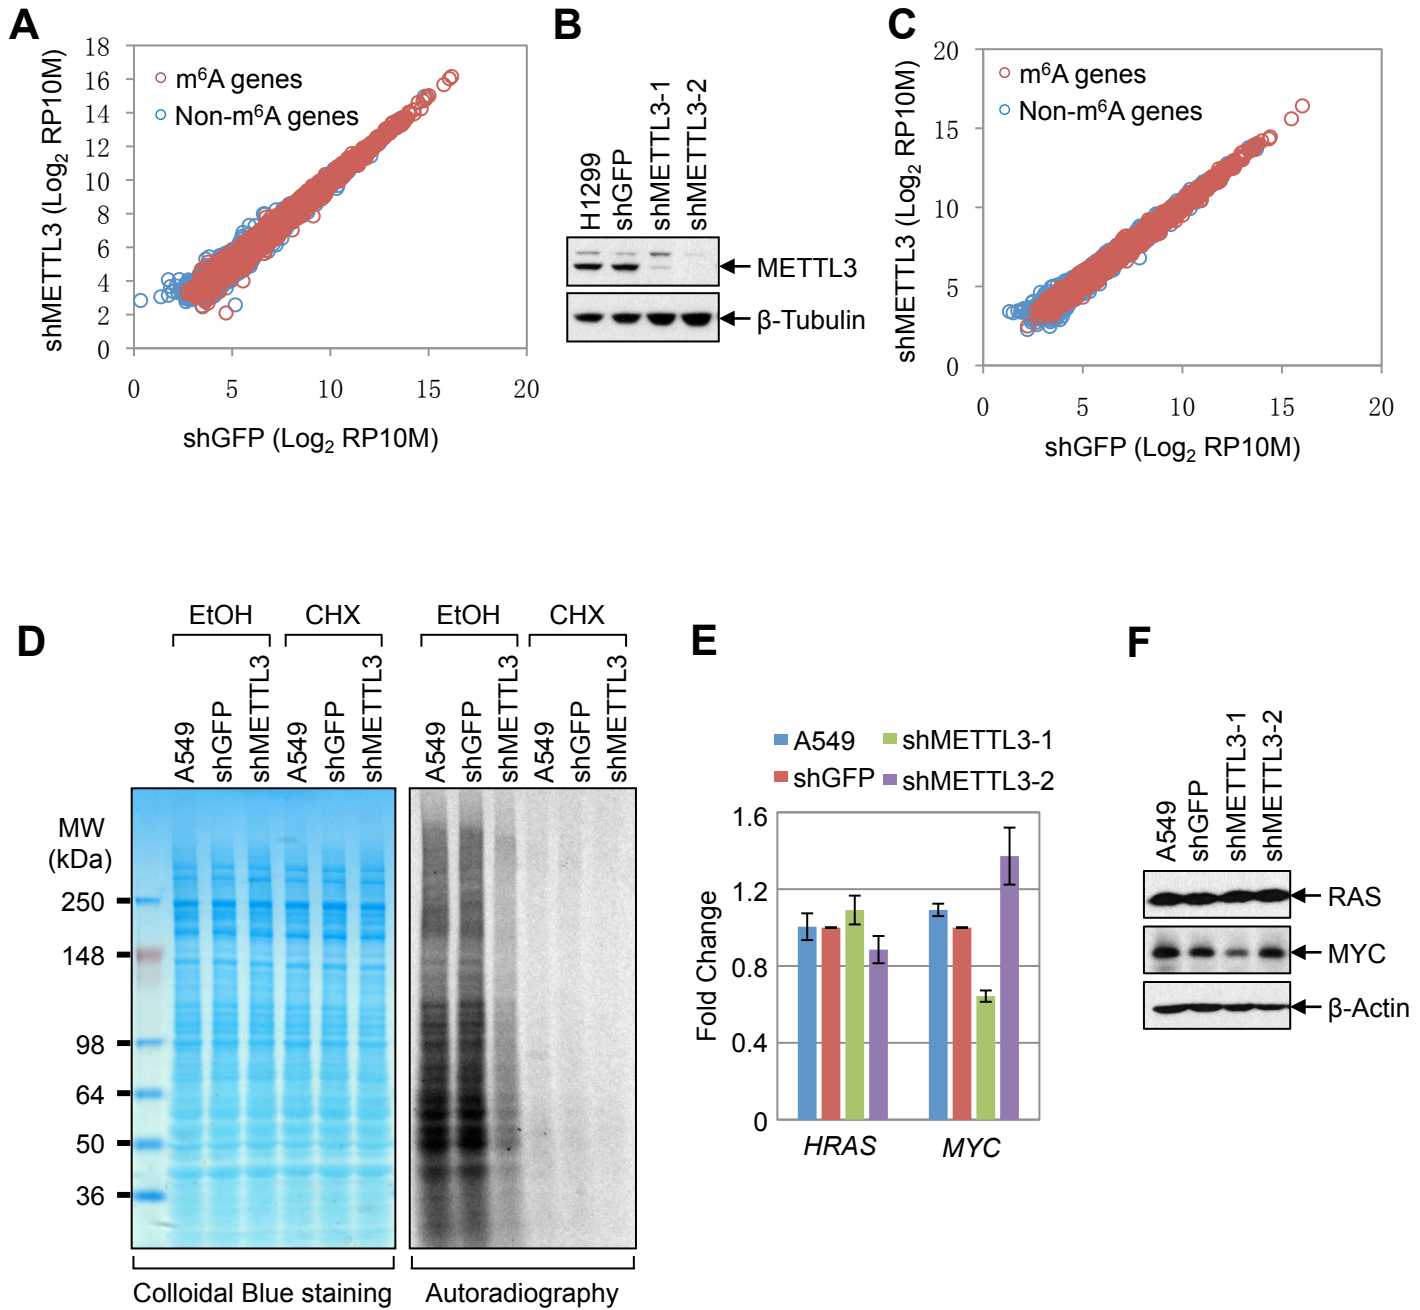

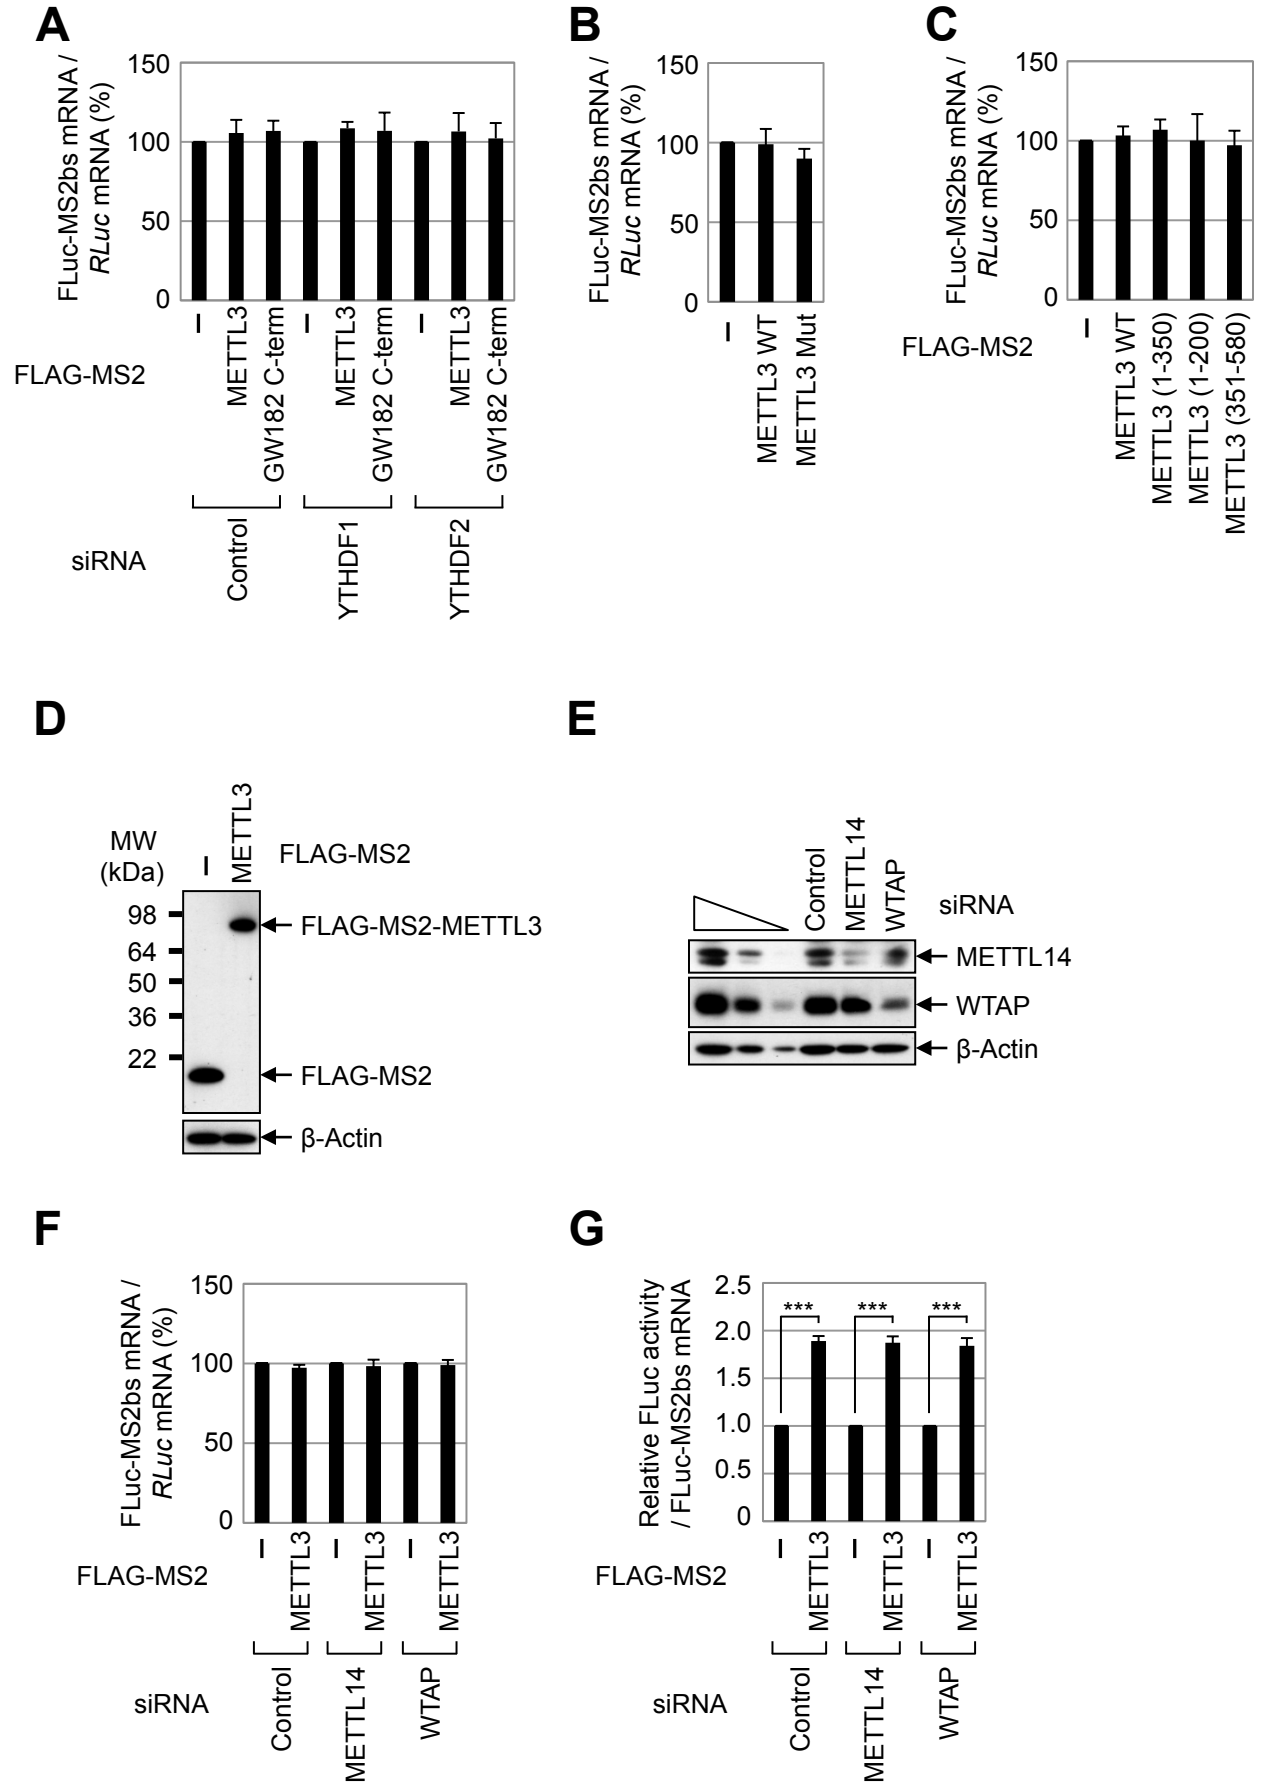

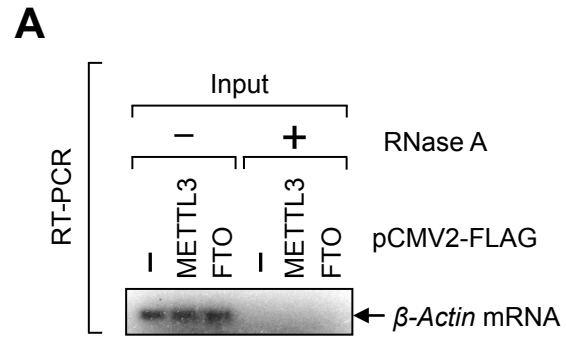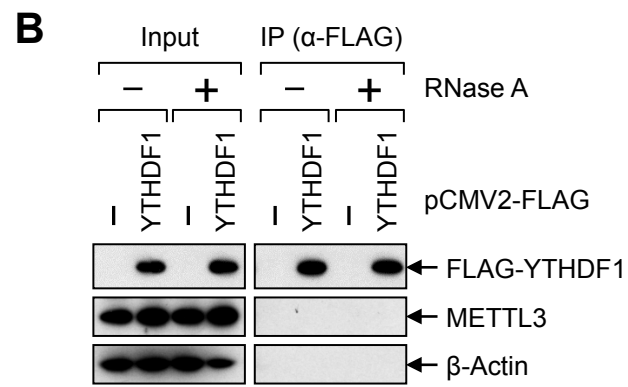

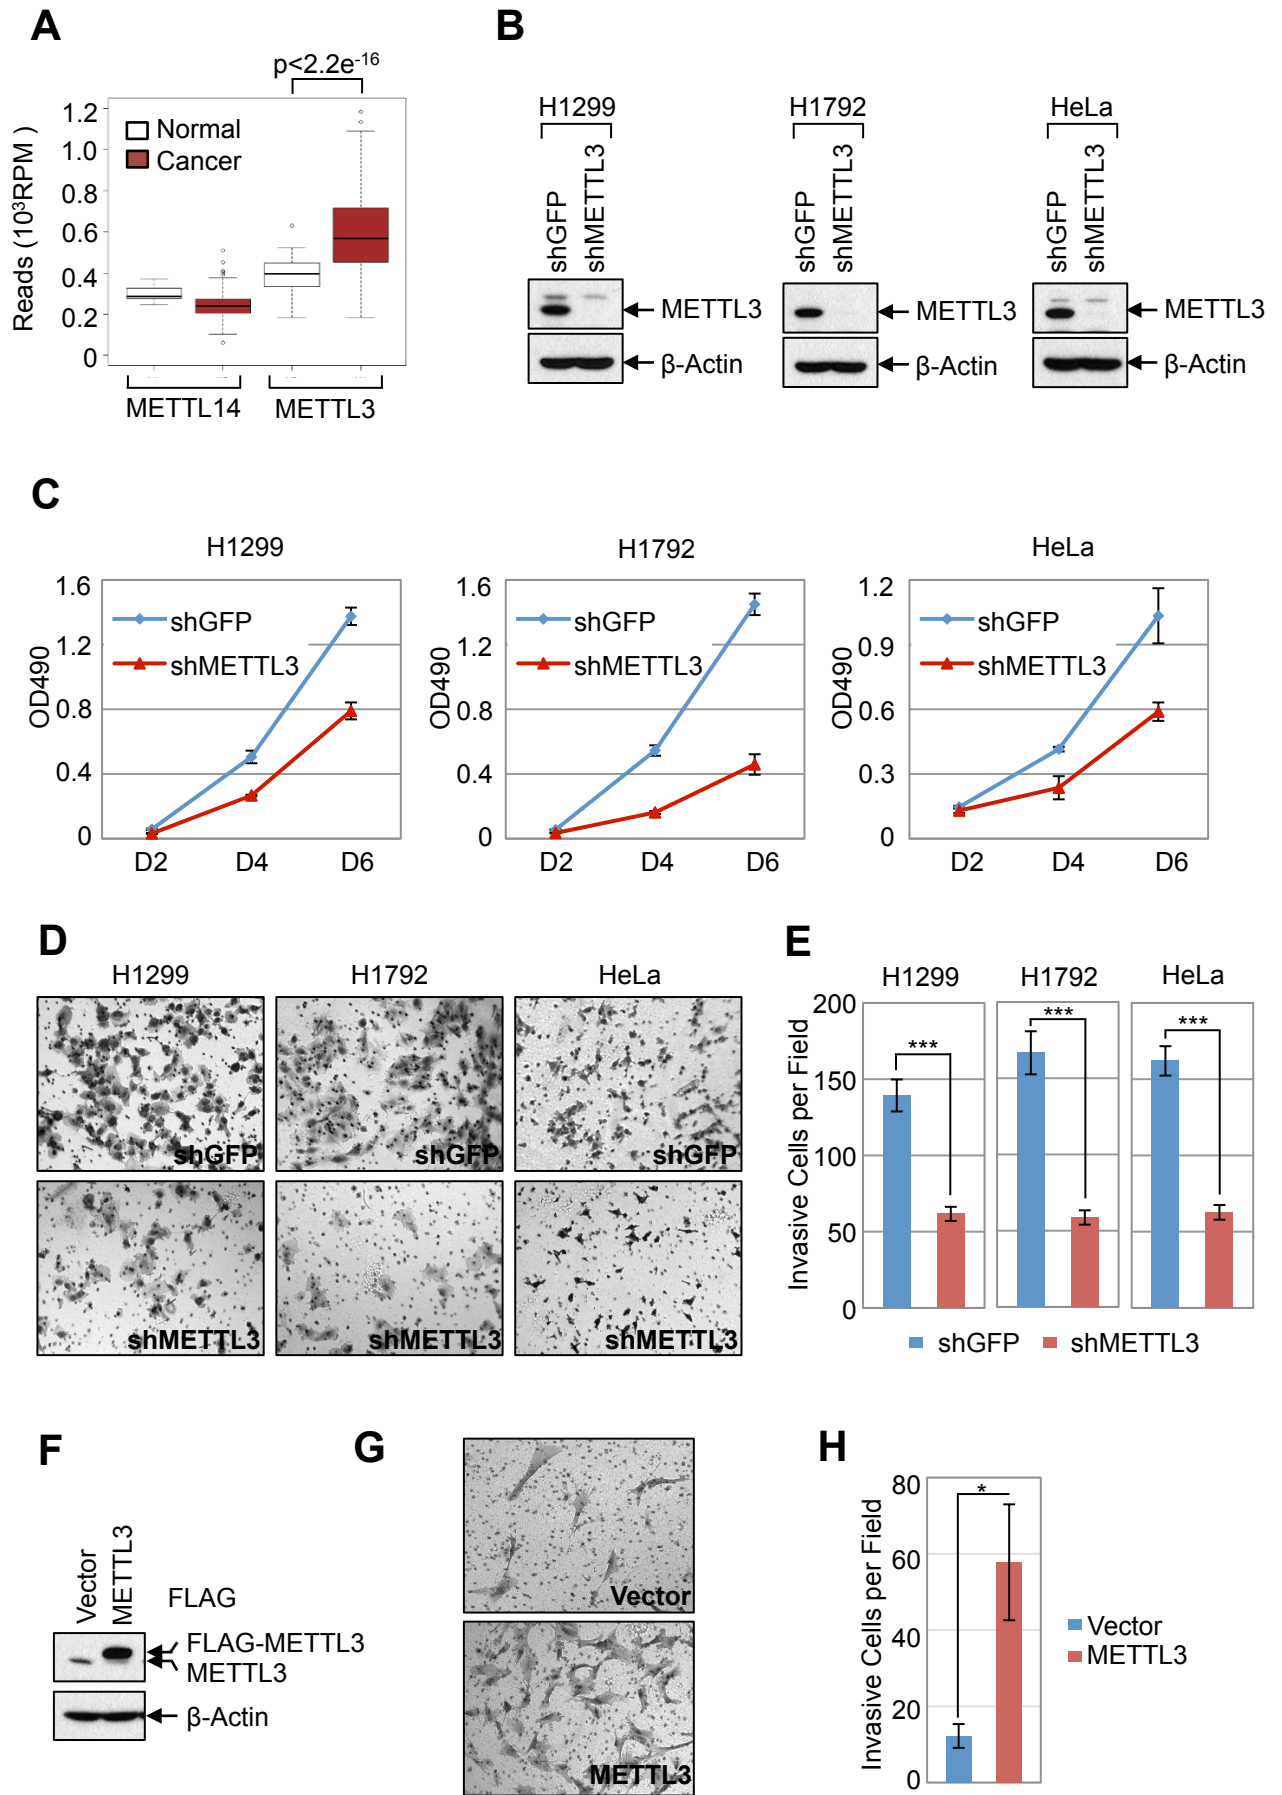

**Supplemental Figure 1. (Related to Figure 1)** (A) Overlap of m<sup>6</sup>A peaks between individual repeats (r1: repeat 1; r2: repeat 2). (B) Overlap of m<sup>6</sup>A peaks between our m<sup>6</sup>A MeRIP-Seq data (g2, this study) with a recently published A546 m<sup>6</sup>A MeRIP-Seq data (g1, GSM1828596) (Ke et al., 2015). (C) Comparison of m<sup>6</sup>A peaks between H1299 and A549 cells. (D) m<sup>6</sup>A peaks in A549 cells. (E) m<sup>6</sup>A peaks in H1299 cells. (F) q.RT-PCR analysis of  $\alpha$ -m<sup>6</sup>A IP in A549 cells using indicated PCR primers. (G) Analysis of EGFR 5' UTR and m<sup>6</sup>A peak region near stop codon using published m<sup>6</sup>A MeRIP-Seq (GSM1135033), m<sup>6</sup>A CLIP (GSM1828596) and METTL3 PAR-CLIP (GSM1135006) data, the bars in the m<sup>6</sup>A CLIP lane indicate methylated A sites (Ke et al., 2015; Liu et al., 2014).

**Supplementary Figure 2. (Related to Figure 1)** (A) Scatter plot of RNA-Seq data in METTL3 knockdown (shMETTL3) and control (shGFP) A549 cells. Two individual shRNAs against METTL3 were used for the METTL3 knockdown and the average read number from the two METTL3 knockdown samples is plotted on the y-axis. (B) Western blot of knockdown of METTL3 in H1299 cells. (C) Scatter plot of RNA-Seq data in METTL3 knockdown (shMETTL3) and control (shGFP) H1299 cells. (D) Metabolic labeling A549 cells with [<sup>35</sup>S]-methionine. Labeled proteins were cell lysates were subjected to 4-12% Tris-Glycine SDS-PAGE and analyzed by autoradiography. Colloidal blue staining was performed to verify equal amounts of loaded protein. (E) q.RT-PCR analysis of mRNA levels in A549 cells using indicated primers. (F) Western blotting of proteins with indicated antibodies in A549 cells.

**Supplemental Figure 3. (Related to Figure 3)** (A-C) q.RT-PCR analysis of reporter mRNAs. FLuc-MS2bs mRNA levels were normalized to RLuc mRNAs. The FLuc:RLuc ratio obtained in MS2 (control) was set to 100%. Error bars = mean  $\pm$ s.d., n=3. (D)  $\alpha$ -FLAG western blot of indicated proteins. (E) Western blot analysis of METTL14 and WTAP expression in control and siRNA knockdown cells. (F) q.RT-PCR analysis of reporter mRNAs. Error bars = mean  $\pm$ s.d.,

n=3. **(G)** Tethering assay to measure translation efficiency of reporter mRNAs as in Figure 3 (D). \*\*\*P<0.001. Error bars = mean  $\pm$ s.d., n=3.

**Supplemental Figure 4. (Related to Figure 4) (A)** Effectiveness of RNase A treatment demonstrated using RT-PCR analysis of  $\beta$ -Actin mRNA. **(B)** Co-IPs of FLAG-YTHDF1.

**Supplemental Figure 5. (Related to Figure 6) (A)** Expression of METTL3 and METTL14 in normal tissue (n=41) and colon adenocarcinoma (n=228) from TCGA-COAD dataset. **(B-E)** Depletion of METTL3 regulates cellular proliferation, survival and invasion of H1299, H1792 and HeLa cells. **(B)** Western blot. **(C)** MTS assay of cellular proliferation. **(D)** *In vitro* cell invasion assay. **(E)** Quantification of invasive cells. **(F-H)** METTL3 overexpression regulate cell invasion in BJ cells. **(F)** Western blot. **(G)** *In vitro* cell invasion assay. **(H)** Quantification of invasive BJ cells. Data are presented as  $\pm$ SEM. \*\*p<0.01, \*\*\*p<0.001.

**Supplemental Table 1 (Related to Figure 1): List and annotation of m6A peaks and target genes in A549 and H1299 cells**

**Supplemental Table 2 (Related to Experimental Procedures): List of primers used for cloning and RT-PCR**

| Cloning Primers   |                                         |
|-------------------|-----------------------------------------|
| NotI-hMETTL3-F    | AACAAGCGGCCGCGTCCGGACACGTGGAGCTCTATCC   |
| BglII-hMETTL3-R   | AACAAAGATCTTAGGTTTAGAGATGATACCATCTGGG   |
| NotI-YTHDF1-F     | AACAAGCGGCCGCGTCCGGCCACCAGCGTGG         |
| BglII-YTHDF1-R    | AACAAAGATCTCATTGTTTGTTCGACTCTGCCG       |
| HindIII-MS-F      | CATAAAGCTTATGGCTTCTAACTTTACTCAGTTCGTTTC |
| HindIII-MS-R      | CGATAAGCTTGTAGATGCCGGAGTTTGCTGCGATTGC   |
| NotI-2xMS2site-F  | ATAAGAATGCGGCCGCCGCGTACACGATCACGGTAC    |
| NotI-2xMS2site-R  | ATAAGAATGCGGCCGCCCGGGAGCATGGGTGAT       |
| NheI-Kozak-FLAG-F | GTCATGCTAGCGCCACCATGGACTACAAAGACGATG    |
| SwaI-METTL3-R     | TCAGATTTAAATTTAGGTTTAGAGATGATACCATCTGGG |

|                              |                           |
|------------------------------|---------------------------|
| METTL3 MUT-F                 | CCCGCGGATATTCACATGGAAGTCC |
| METTL3 MUT-R                 | TGGGGCAGCCATCACAAGTCAAAC  |
| PCR Primers for m6A-IP-q.PCR |                           |
| hEGFR(peak)-F                | CAGAAAGGCAGCCACCAAAT      |
| hEGFR(peak)-R                | GCTTGGCTTCCTTGGGAAAG      |
| hEGFR(non-peak)-F            | AGCAGTCCTTTGTAAACAGT      |
| hEGFR(non-peak)-R            | TCTGAACCATTTCTTCCTTGAT    |
| hTAZ(peak)-F                 | CCTTCTGGATTCTTGGCCCG      |
| hTAZ(peak)-R                 | GTCTAAAAGCCACGTTTGAGC     |
| hTAZ(non-peak)-F             | ATGAGTTCGGAATTCCTGCGT     |
| hTAZ (non-peak)-R            | ATTCCGACATGCCACAGGG       |
| hMAPKAPK2(peak)-F            | CCCACTGAGCCACCGC          |
| hMAPKAPK2(peak)-R            | TTCCTGTAGAGAGTTATTGCTTGT  |
| hMAPKAPK2(non-peak)-F        | ACGGATCGTGGATGTGTACG      |
| hMAPKAPK2(non-peak)-R        | AGTTCTCCACCGTCCAAACA      |
| hDNMT3A(peak)-F              | TCGCTCCGCTGAAGGAGTAT      |
| hDNMT3A(peak)-R              | CTACCTCAGTTTGCCCCCAT      |
| hDNMT3A(non-peak)-F          | AGGACATCTTATGGTGCCTGA     |
| hDNMT3A(non-peak)-R          | CCAAGCGGCTCATGTTGGAG      |
| hHRAS(peak)-F                | ACTGCAGACCCTCCAGG         |
| hHRAS(peak)-R                | GGAGCTAAGGGCTGGGGTTC      |
| hHRAS(non-peak)-F            | TGGACGAATACGACCCCACTA     |
| hHRAS(non-peak)-R            | GATGTCCAACAGGCACGTCT      |
| RT-PCR Primers               |                           |
| hEGFR-F                      | TCTGAGTGCAACCAGCAACA      |
| hEGFR-R                      | GTGGGGTCTGAGCTGTATCG      |
| hMETTL3-F                    | CAAGCTGCACTTCAGACGAA      |
| hMETTL3-R                    | GCTTGGCGTGTGGTCTTT        |
| hTAZ-F                       | ATGAGTTCGGAATTCCTGCGT     |
| hTAZ-R                       | ATTCCGACATGCCACAGGG       |
| hMAPKAPK2-F                  | ACGGATCGTGGATGTGTACG      |
| hMAPKAPK2-R                  | AGTTCTCCACCGTCCAAACA      |
| hDNMT3A-F                    | TGATGCCAAAGAAGTGTCAGC     |
| hDNMT3A-R                    | TTCACAGTGGATGCCAACGG      |
| h- $\beta$ -Actin-F          | TTCTACAATGAGCTGCGTGTG     |
| h- $\beta$ -Actin-R          | GGGGTGTGAAGGTCTCAA        |
| hHRAS-F                      | GGCATCCCCTACATCGAGAC      |
| hHRAS-R                      | TCCCGGAGCTGGAGCTAGA       |
| hMYC-F                       | GGACTATCCTGCTGCCAAGA      |
| hMYC-R                       | CGCCTCTTGACATTCTCCTC      |
| hRCN2-F                      | AGGGCATTGCACAAGAGGAG      |
| hRCN2-R                      | CATCATGGAGCTGTCTGCCA      |
| hHPRT1-F                     | TGACACTGGCAAACAATGCA      |
| hHPRT1-R                     | GGTCCTTTTACCAGCAAGCT      |
| Firefly-luc-F                | GGTACTGTTGGTAAAGCCAC      |
| Firefly-luc-R                | CTCTTCATAGCCTTATGCAG      |
| Renilla-luc-F                | CACTGGGCAGGTGTCCACTC      |
| Renilla-luc-R                | GTTCTGGATCATAAACTTTC      |

**Supplemental Table 2 (Related to Experimental Procedures): List of primers sequences used for cloning and q.RT-PCR.**
